# Supplementary material for: Identification and Expression Analysis of Wnt2 Gene in the Sex Differentiation of the Chinese Soft-Shelled Turtle (Pelodiscus sinensis)
Source: MDPI journal article supplement (doi:10.3390/life13010188), 2023-01-09
Supplement: s1 [file s1]

Supplementary materials

**Figure S1. Relative Wnt genes expression during embryo development stages.**

A (females) , B (males)

**Figure S2. The structure of Wnt proteins in pelodiscus sinensis.**

The green boxes indicate the conserved Wnt1 domains. The blue boxes indicate transmembrane regions. The red boxes indicate signal peptides.

**Figure S3. Expressions of sex-related genes after treatment Wnt agonist.**

(A-D) Expressions of *Dmrt1*, *Amh*, *Sox3*, and *Wnt4* respectively in females after treatment with Wnt agonist. (E-H) Expressions of *Dmrt1*, *Amh*, *Sox3*, and *Wnt4* respectively in males after treatment with Wnt agonist.

**Table S1. Comparison of deduce amino region of *P. sinensis* Wnt2 with that of other species.**

Figure S1

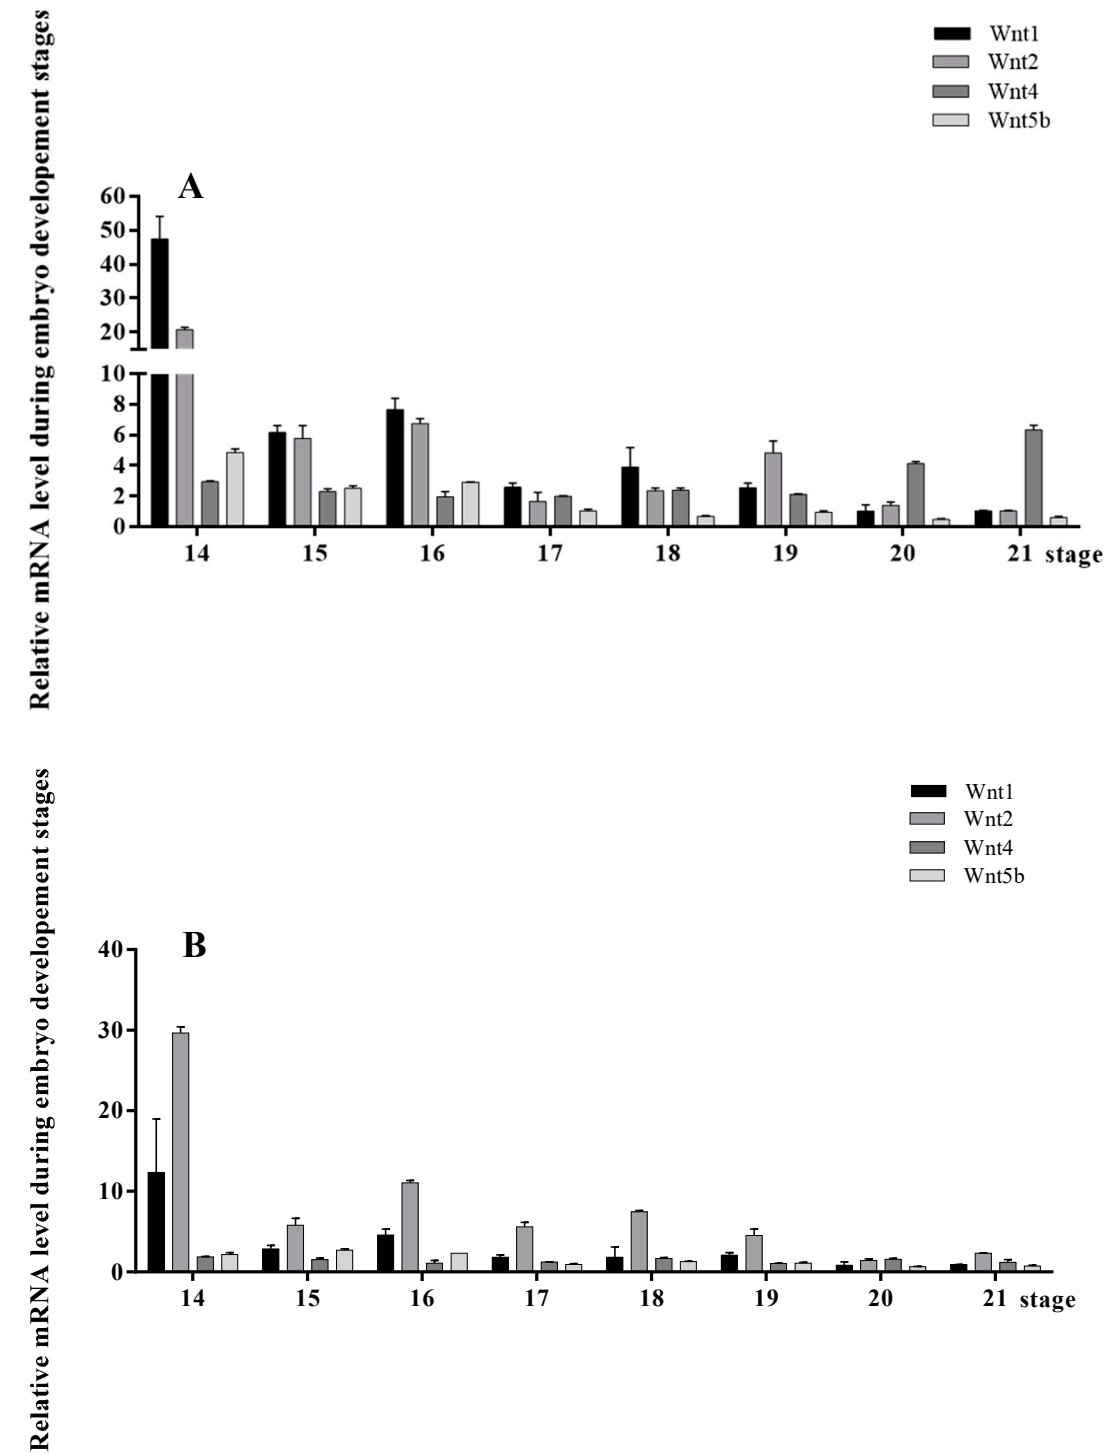

Figure S2

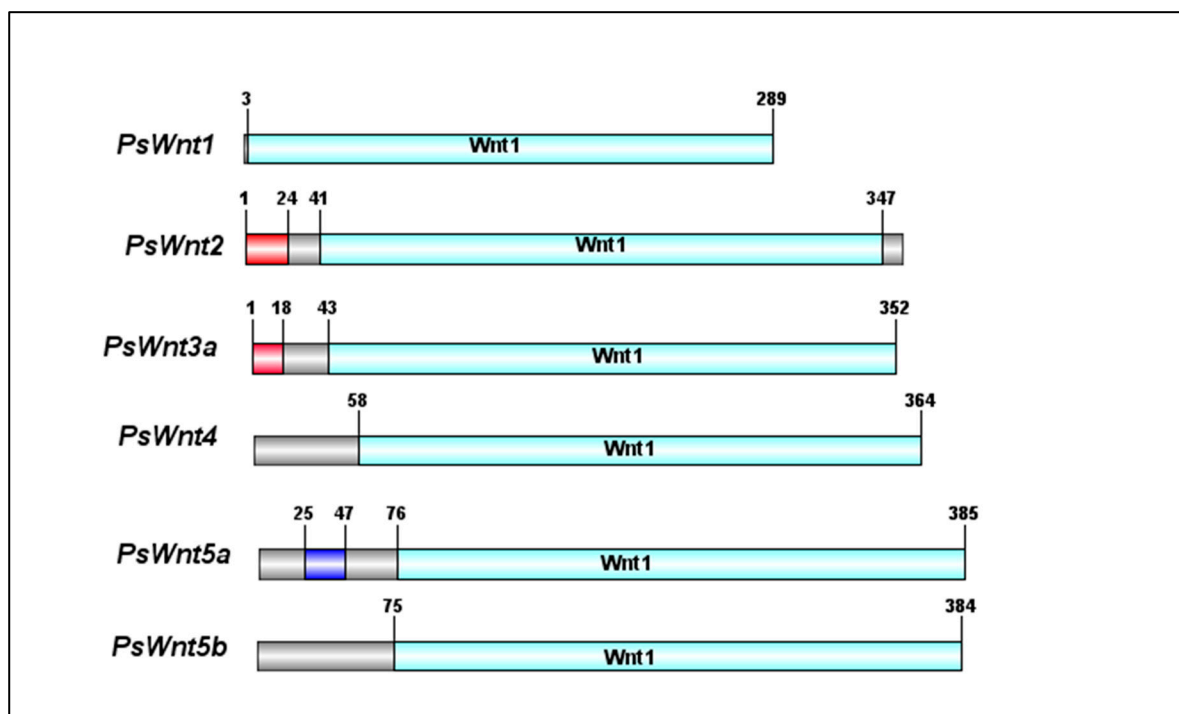

FigureS3

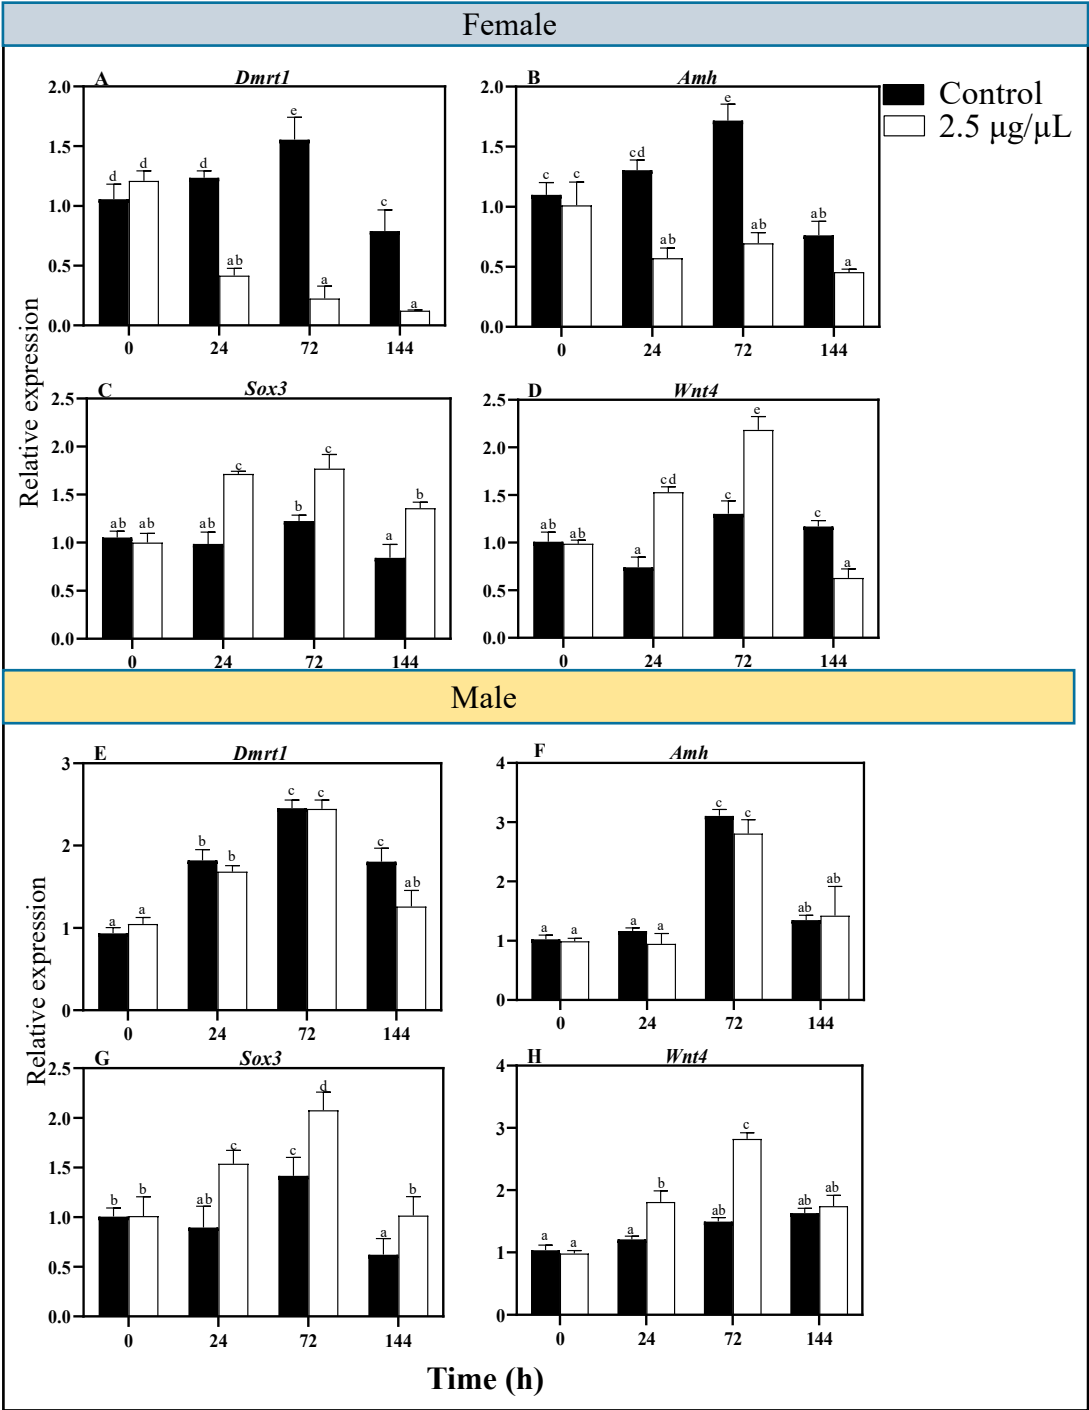

**Table S1.**

| Species                      | Identity |
|------------------------------|----------|
| Chrysemys_picta_bellii       | 88.3%    |
| Chelonia_mydas               | 88.56%   |
| Terrapene_carolina_triunguis | 88.83%   |
| Gopherus_evgoodei            | 86.79%   |
| Chelonoidis_abingdonii       | 87.77%   |
| Trachemys_scripta_elegans    | 88.30%   |
| Mauremys_reevesii            | 87.50%   |
| Mus_musculus                 | 79.79%   |
| Homo_sapiens                 | 78.19%   |
| Danio_rerio                  | 63.03%   |
| Gallus_gallus                | 80.05%   |
